# Supplementary material
Source: publisher site journal article supplement (https://www.dovepress.com/article/563173)
Supplement: Supplementary file 1 [file 563173%20Supplementary%20Materials.pdf]

## ***Supplementary Material***

**1. Supplementary Methods**

**2. Table S1** Missing Rates of Baseline Covariates

**3. Table S2** Results of the Proportional Hazards Assumption Testing for Cox Models

**4. Figure S1** Assessment of the Proportional Hazards Assumption for MHR using Schoenfeld Residual Plots.

**5. Table S3** Association between MHR and COPD All-Cause Mortality: Results after Multiple Imputation (N=2303)

**6. Table S4** Association between MHR and COPD All-Cause Mortality: Results after Excluding Outliers (>3SD) (N=1750)

## Supplementary Methods

### Description of covariate definitions

Age, gender, race, marital status, education level, and poverty-income ratio (PIR) of participants were obtained from self-report at the time of the interview. Race was categorized into four groups: non-Hispanic White, non-Hispanic Black, Hispanic (Mexican American), and other racial groups. Marital status was classified as either married or living with a partner, or living alone. Education level was categorized as less than 9 years, 9–12 years, or more than 12 years.

**BMI** was calculated as the weight in kilograms (kg) divided by the square of the height in meters (m<sup>2</sup>) and was used to evaluate obesity.

**Smoking status** was divided into three categories based on lifetime cigarette consumption: never smokers (<100 cigarettes), former smokers (≥100 cigarettes but not currently smoking), and current smokers (≥100 cigarettes and currently smoking).

**Drinking** status was self-reported and categorized as drinkers (defined as having consumed at least 12 alcoholic drinks in their lifetime) or non-drinkers (not meeting this threshold).

**Hypertension** was defined as blood pressure measurement ≥140/90 mmHg or self-reported hypertension diagnosis.

**Diabetes** was determined using a combination of self-reported information and laboratory measurements. Participants were classified as having diabetes if they met any of the following criteria:

1. Self-reported a prior physician diagnosis of diabetes.
2. Glycated hemoglobin (HbA1c) values ≥6.5%.
3. Fasting glucose concentrations ≥7.0 mmol/L after an overnight fast.
4. Random glucose levels ≥11.1 mmol/L.
5. 2-hour post-challenge glucose readings ≥11.1 mmol/L during standard oral glucose tolerance testing.

6. Current use of antidiabetic medications, including insulin therapy.

The diagnosis of ASCVD was based on self-reported responses to the following questions from the MCQ section of the survey:

- "Have you ever been told you have coronary heart disease (CHD)?"
- "Have you ever been told you have angina/angina pectoris?"
- "Have you ever been told you had a heart attack?"
- "Have you ever been told you had a stroke?"

A “yes” response to any of these questions was classified as ASCVD.

**Cancer** was defined as a self-report of ever being diagnosed with cancer or malignancy.

**Eosinophils** were measured as part of the standard complete blood count (CBC) in NHANES and reported in  $\times 10^9/L$ . Blood samples were collected during the physical examination component and analyzed according to NHANES laboratory protocols.

**HDL (High-Density Lipoprotein) cholesterol** was measured enzymatically via Roche Modular P chemistry analyzers and expressed in mmol/L.

**Table S1** Missing Rates of Baseline Covariates

| Excluded variable | Missing rate |
|-------------------|--------------|
| Age               | 0.0%         |
| Gender            | 0.0%         |
| Race              | 0.0%         |
| Education level   | 0.13%        |
| Marital Status    | 0.35%        |
| Smoking status    | 0.09%        |
| Drinking status   | 5.56%        |
| Hypertension      | 0.35%        |
| Diabetes          | 9.73%        |
| Cancer            | 0.22%        |
| ASCVD             | 0.04%        |
| PIR               | 7.90%        |
| BMI               | 2.0%         |
| Eosinophils       | 0.0%         |

**Abbreviations:** PIR, poverty-income ratio; ASCVD, atherosclerotic cardiovascular disease; BMI, body mass index.

**Table S2** Results of the Proportional Hazards Assumption Testing for Cox Models

| <b>Mortality</b> | <b>All-cause Mortality</b> |         |
|------------------|----------------------------|---------|
|                  | Chi-square( $\chi^2$ )     | p-value |
| Gender           | 0.283                      | 0.595   |
| Age              | 0.195                      | 0.659   |
| Race             | 6.457                      | 0.091   |
| Education level  | 0.602                      | 0.740   |
| Marital Status   | 1.082                      | 0.298   |
| PIR              | 0.698                      | 0.403   |
| BMI              | 0.056                      | 0.813   |
| Smoking status   | 1.605                      | 0.448   |
| Drinking status  | 0.023                      | 0.879   |
| Hypertension     | 0.046                      | 0.829   |
| Diabetes         | 2.160                      | 0.142   |
| ASCVD            | 0.176                      | 0.674   |
| Cancer           | 1.140                      | 0.286   |
| Eosinophils      | 0.122                      | 0.727   |
| MHR              | 1.698                      | 0.193   |
| <b>GLOBAL</b>    | 16.953                     | 0.593   |

**Note:** The proportional hazards assumption was assessed using Schoenfeld residual tests. This table presents the results for all-cause mortality models. GLOBAL represents the overall test for all variables combined. p-values greater than 0.05 indicate that the proportional hazards assumption was not violated.

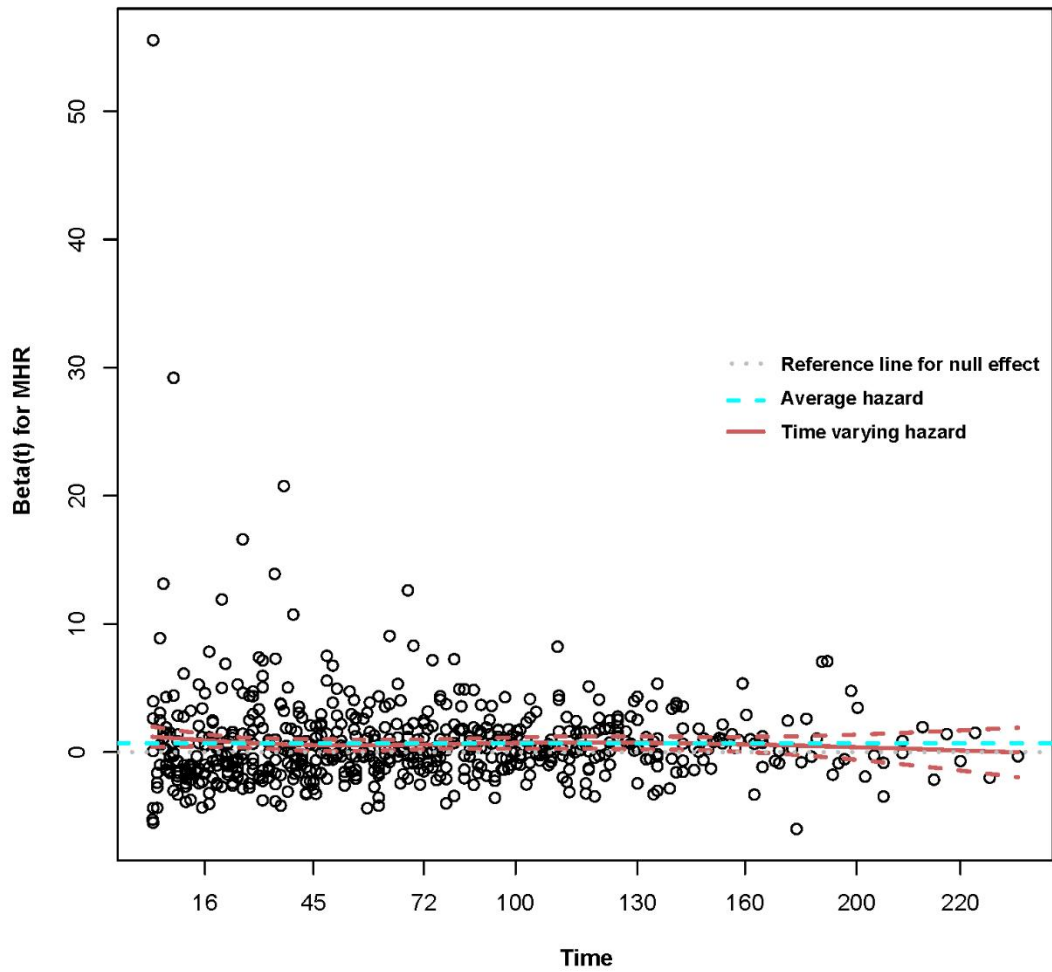

**Figure S1** Assessment of the Proportional Hazards Assumption for MHR using Schoenfeld Residual Plots

Schoenfeld residual plots visually assessing the proportional hazards assumption for MHR in all-cause mortality models (Time in months). The smoothed estimates (red lines with 95% CI) show no clear time-dependent trend, consistent with formal tests (Table S2,  $P=0.193$ )

**Table S3** Association between MHR and COPD All-Cause: Results after Multiple Imputation(N=2303)

|                    | Events    | Model           |         |                 |         |                 |         |
|--------------------|-----------|-----------------|---------|-----------------|---------|-----------------|---------|
|                    |           | Model 1         |         | Model 2         |         | Model 3         |         |
|                    |           | HR, 95%CI       | p-Value | HR, 95%CI       | p-Value | HR, 95%CI       | p-Value |
| MHR                | 801(34.8) | 2.14(1.71~2.67) | <0.001  | 1.87(1.48~2.36) | <0.001  | 1.71(1.35~2.18) | <0.001  |
| MHR tertile        |           |                 |         |                 |         |                 |         |
| T1                 | 254(33.3) | References      |         | References      |         | References      |         |
| T2                 | 252(32.9) | 0.86(0.67~1.11) | 0.256   | 0.98(0.82~1.18) | 0.823   | 0.91(0.71~1.17) | 0.462   |
| T3                 | 295(38.1) | 1.36(1.05~1.75) | 0.018   | 1.24(1.03~1.49) | 0.024   | 1.34(1.03~1.75) | 0.028   |
| <b>P for trend</b> |           |                 | <0.001  |                 | 0.017   |                 | 0.082   |

**Notes:**

**Model 1:** no covariates were adjusted;

**Model 2:** Adjusted for gender, age, race, education level, marital status, PIR, BMI, smoking status, drinking status;

**Model 3** was adjusted for model 2+ ASCVD, hypertension, diabetes, cancer, eosinophils

**Abbreviations:** MHR, monocyte-high-density lipoprotein cholesterol ratio; PIR, poverty-income ratio; ASCVD, atherosclerotic cardiovascular disease; BMI, body mass index.

**Table S4** Association between MHR and COPD All-Cause Mortality: Results after Excluding Outliers (>3SD) (N=1750)

|                    | Events    | Model           |         |                 |         |                 |         |
|--------------------|-----------|-----------------|---------|-----------------|---------|-----------------|---------|
|                    |           | Model 1         |         | Model 2         |         | Model 3         |         |
|                    |           | HR, 95%CI       | p-Value | HR, 95%CI       | p-Value | HR, 95%CI       | p-Value |
| MHR                | 596(34.1) | 2.03(1.45~2.85) | <0.001  | 2.02(1.38~2.95) | <0.001  | 1.88(1.27~2.76) | 0.001   |
| MHR tertile        |           |                 |         |                 |         |                 |         |
| T 1                | 195(33.0) | References      |         | References      |         | References      |         |
| T 2                | 186(31.8) | 1.04(1.85~1.27) | 0.710   | 1.03(0.84~1.27) | 0.775   | 1.00(0.81~1.24) | 0.993   |
| T 3                | 215(37.4) | 1.44(1.18~1.75) | <0.001  | 1.33(1.07~1.64) | 0.010   | 1.28(1.03~1.59) | 0.028   |
| <b>P for trend</b> |           |                 | <0.001  |                 | 0.009   |                 | 0.025   |

**Notes:** Outliers were defined as values exceeding 3 standard deviations from the mean of the original MHR distribution in the analytic sample (N=1750) and were excluded.

**Model 1:** no covariates were adjusted;

**Model 2:** Adjusted for gender, age, race, education level, marital status, PIR, BMI, smoking status, drinking status;

**Model 3** was adjusted for model 2+ ASCVD, hypertension, diabetes, cancer, eosinophils

**Abbreviations:** MHR, monocyte-high-density lipoprotein cholesterol ratio; PIR, poverty-income ratio; ASCVD, atherosclerotic cardiovascular disease; BMI, body mass index.
